# Supplementary material for: Optical Band Gap Tuning, DFT Understandings, and Photocatalysis Performance of ZnO Nanoparticle-Doped Fe Compounds
Source: MDPI journal article supplement (doi:10.3390/ma16072676), 2023-03-28
Supplement: s1 [file s1]

Figure S1(a,b) exhibited the presence of Fe around 800 eV, as shown in b.

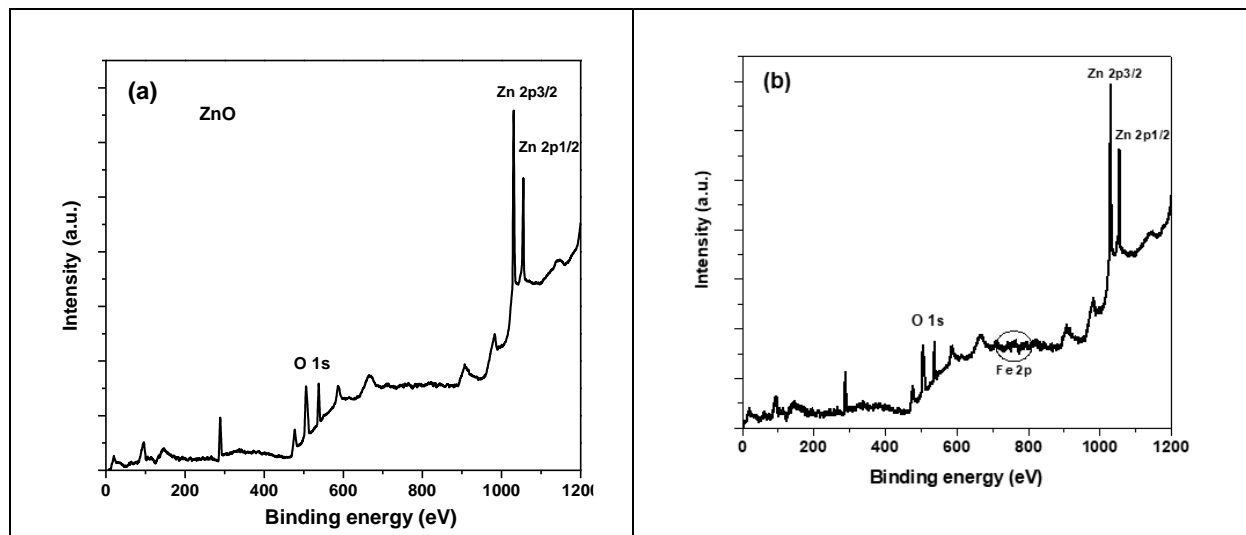

As exhibited in figure S2, the increase in the Fe concentrations demonstrated a significant decrease in the intensity PL, suggesting a larger barrier to charge recombination.

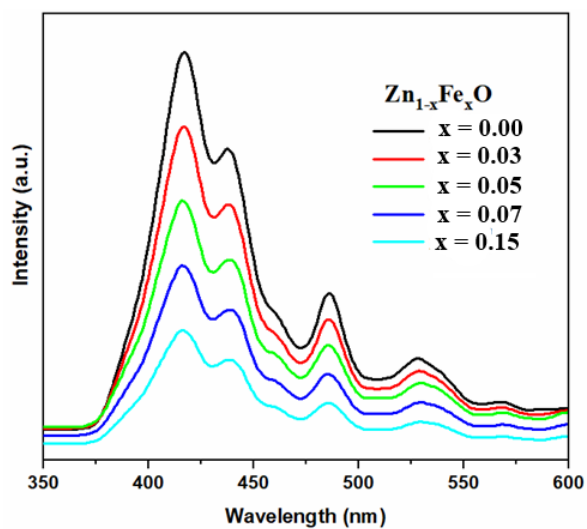

Figure S2: PL spectra of Zn<sub>1-x</sub>Fe<sub>x</sub>O
